# Supplementary material for: Neighbour-sensitized near-infrared emission of new Nd(iii) and Er(iii) complexes with 1-(anthracene-2-yl)-4,4,4-trifluoro-1,3-butanedione
Source: Royal Society of Chemistry journal article supplement (doi:10.1039/c6nj00999a), 2016-01-01
Supplement: c6nj00999a1.pdf [file c6nj00999a1.pdf]

## Electronic Supplementary Information

### Neighbour-sensitized near-infrared emission of new Nd(III) and Er(III) complexes with 1-(anthracene-2-yl)-4,4,4-trifluoro-1,3-butanedione

Jung-Soo Kang,<sup>a</sup> Kam Tong Leung,<sup>a</sup> Min-Kook Nah,<sup>b</sup> Jung-Sik Shin,<sup>b</sup> Myung-Hyun Kang,<sup>b</sup> Bonggeun Shong,<sup>b</sup> Jun-Gill Kang,<sup>b,c\*</sup> Jisuk Lee,<sup>d</sup> and Youngku Sohn<sup>d,\*</sup>

<sup>a</sup>WATLab and Department of Chemistry, University of Waterloo, Waterloo, Ontario N2L 3G1, Canada

<sup>b</sup>Department of Chemistry, Chungnam National University, Daejeon, 34134, Republic of Korea

<sup>c</sup>ReSEAT Program, Korea Institute Science and Technology Information, Daejeon, 34141, Republic of Korea

<sup>d</sup>Department of Chemistry, Yeungnam University, Gyeongsan, Gyeongbuk 38541, Republic of Korea

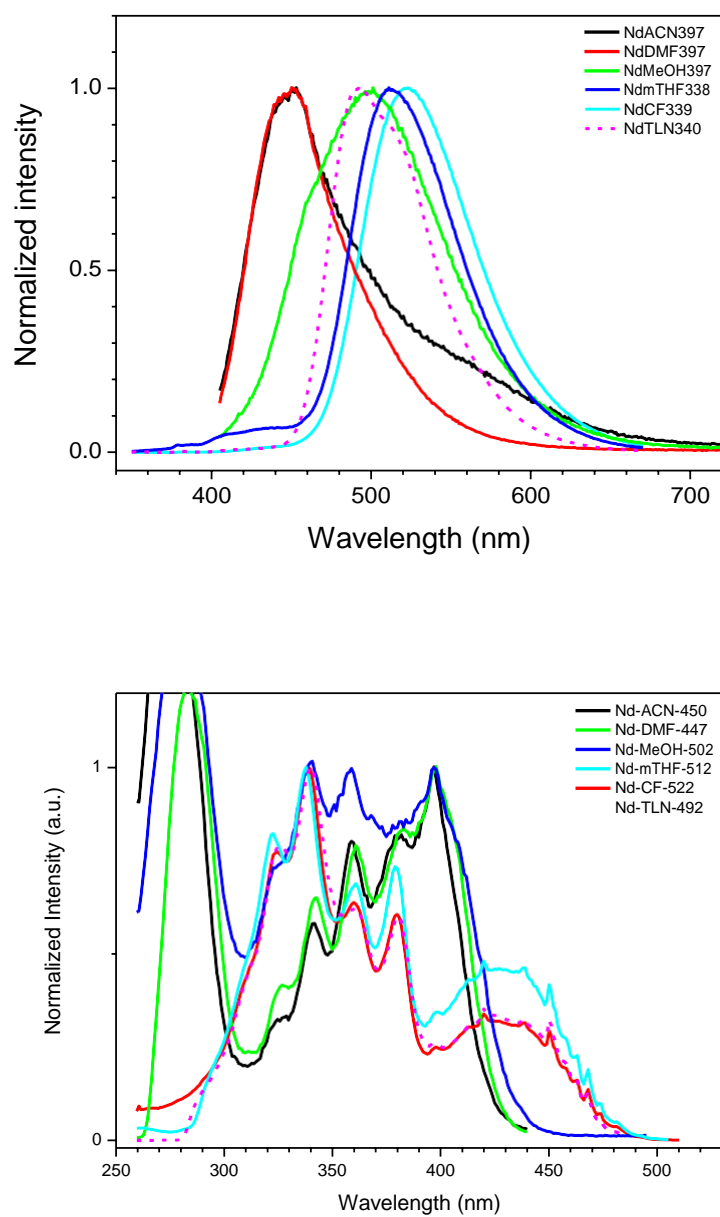

**Fig. S1.** Visible luminescence (a) and excitation (b) spectra of  $\text{Nd}(\text{2-ATFB})_3$  dissolved in various solvents.

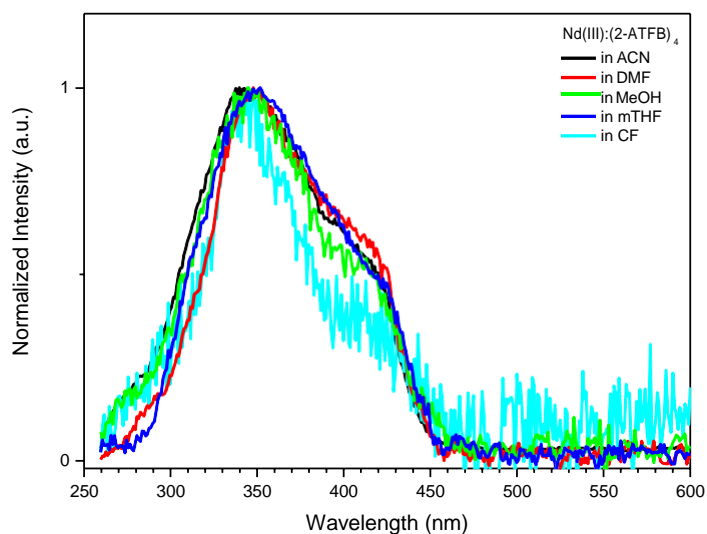

**Fig. S2.** Excitation spectra of the visible and the NIR luminescence of  $\text{Nd}(\text{2-ATFB})_3$  dissolved in various solvents.

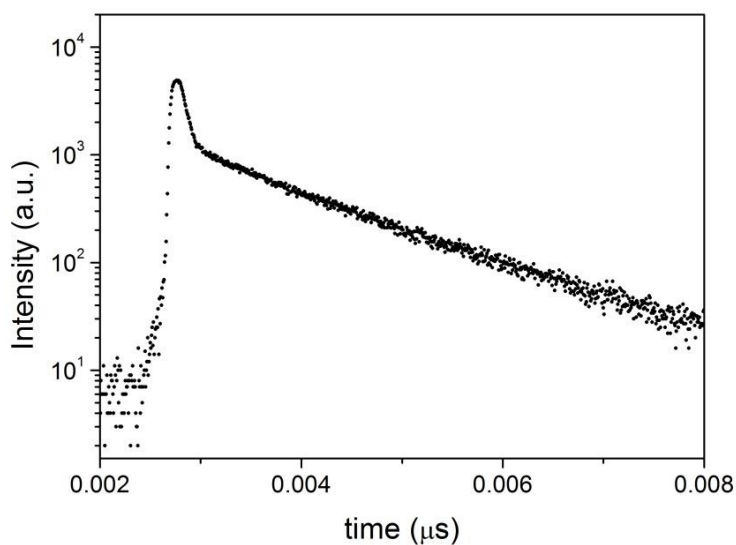

**Fig. S3.** Typical decay data of the 1060 nm emission from  $\text{Nd}(\text{2-ATFB})_3$  in MeCN. The early stage in the profile was due to a scattered light from the pumping source. A semi-log plot of the data vs. time shows that the luminescence decay is satisfied by one exponential component.

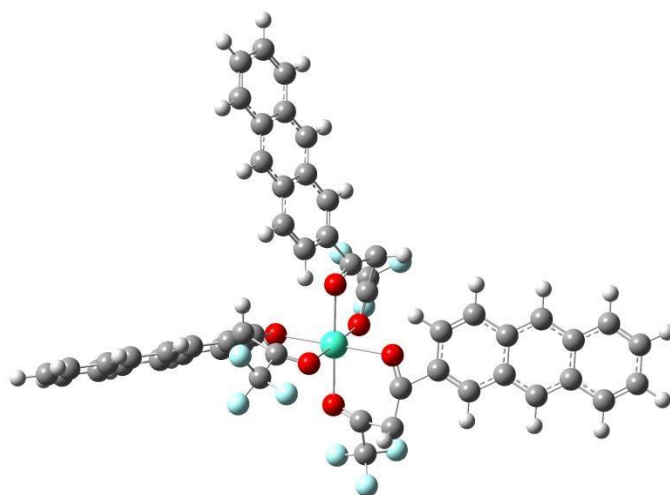

**Fig. S4.** Molecular geometry of  $\text{Gd}(\text{2-ATFB})_3$  molecule optimized on the DFT/B3LYP level using Gen basis set (MWB28 for Gd, and 3-21G for H, C, O, and F) in Gaussian 09.

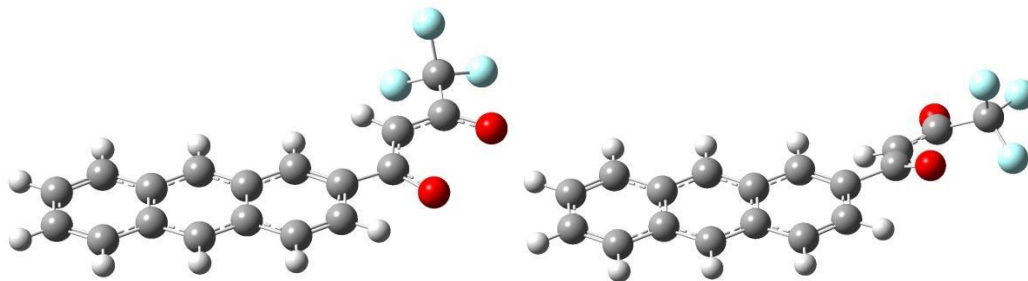

**Fig. S5.** Optimized geometries of coordinate and free 2-ATFB anions optimized on the DFT/B3LYP level using 3-21G basis function in Gaussian 09.

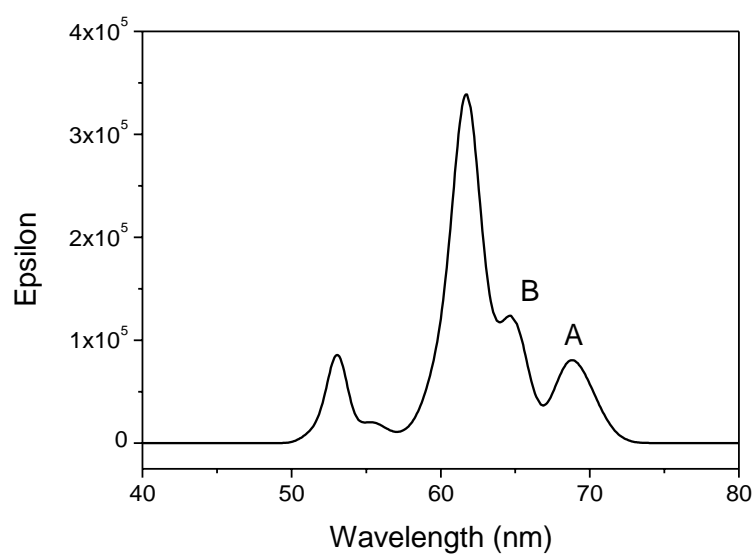

**Fig. S6.** Simulated UV-visible spectrum of 2-ATFB anion molecule in gas phase.
